# Supplementary material for: Changes in Nitrification Kinetics and Diversity of Canonical Nitrifiers and Comammox Bacteria in a Moving Bed Sequencing Batch Biofilm Reactor—A Long-Term Study
Source: MDPI journal article supplement (doi:10.3390/w16040534), 2024-02-08
Supplement: s1 [file s1]

# Changes in Nitrification Kinetics and Diversity of Canonical Nitrifiers and Comammox Bacteria in a Moving Bed Sequencing Batch Biofilm Reactor—A Long-Term Study

Olga Zajac <sup>1</sup>, Monika Zubrowska-Sudol <sup>1,\*</sup>, Matyna Godzieba <sup>2</sup> and Slawomir Ciesielski <sup>2</sup>

<sup>1</sup> Department of Water Supply and Wastewater Treatment, Faculty of Building Services, Hydro and Environmental Engineering, Warsaw University of Technology, Nowowiejska 20, 00-653 Warsaw, Poland; olga.zajac.dokt@pw.edu.pl (O.Z.); monika.sudol@pw.edu.pl (M.Z-S)

<sup>2</sup> Department of Environmental Biotechnology, University of Warmia and Mazury in Olsztyn, Sloneczna 45G, 10-709 Olsztyn, Poland; martyna.godzieba@uwm.edu.pl (M.G.); slawomir.ciesielski@uwm.edu.pl (S.C.)

\* Correspondence: monika.sudol@pw.edu.pl;

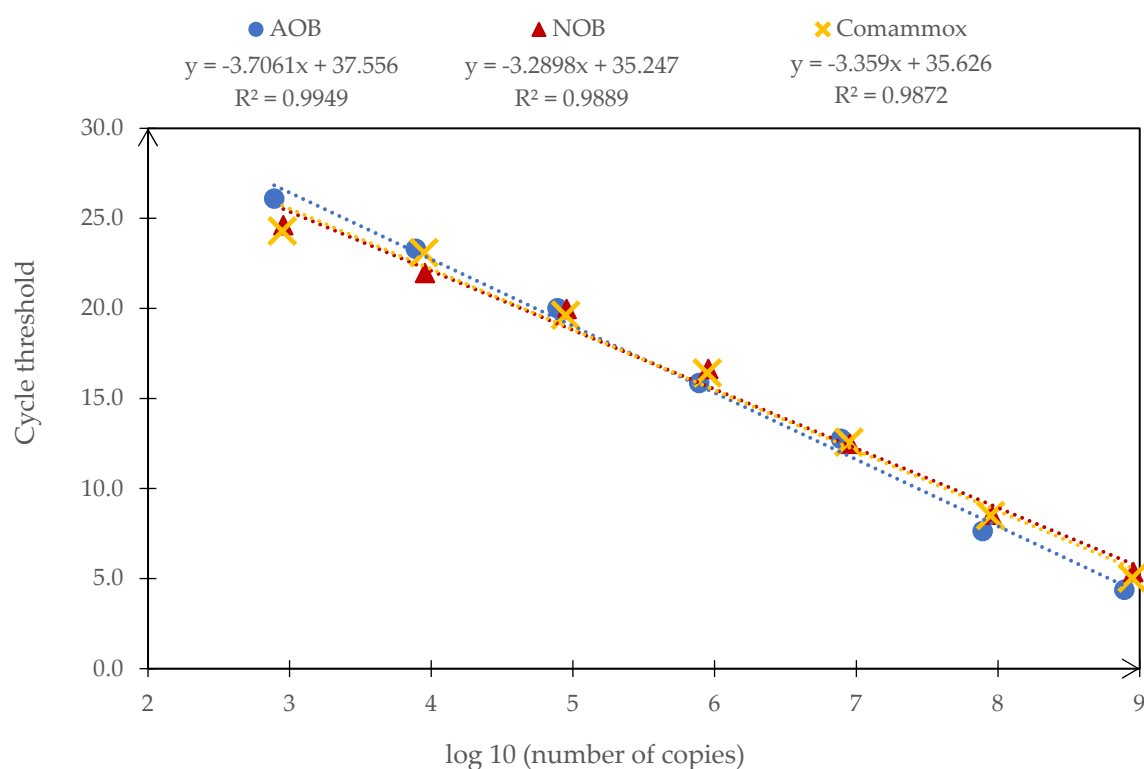

**Figure S1.** qPCR standard curves created for amoA gene fragment of canonical AOB, 16S gene fragment of NOB, and amoA of Comammox bacteria.

a.

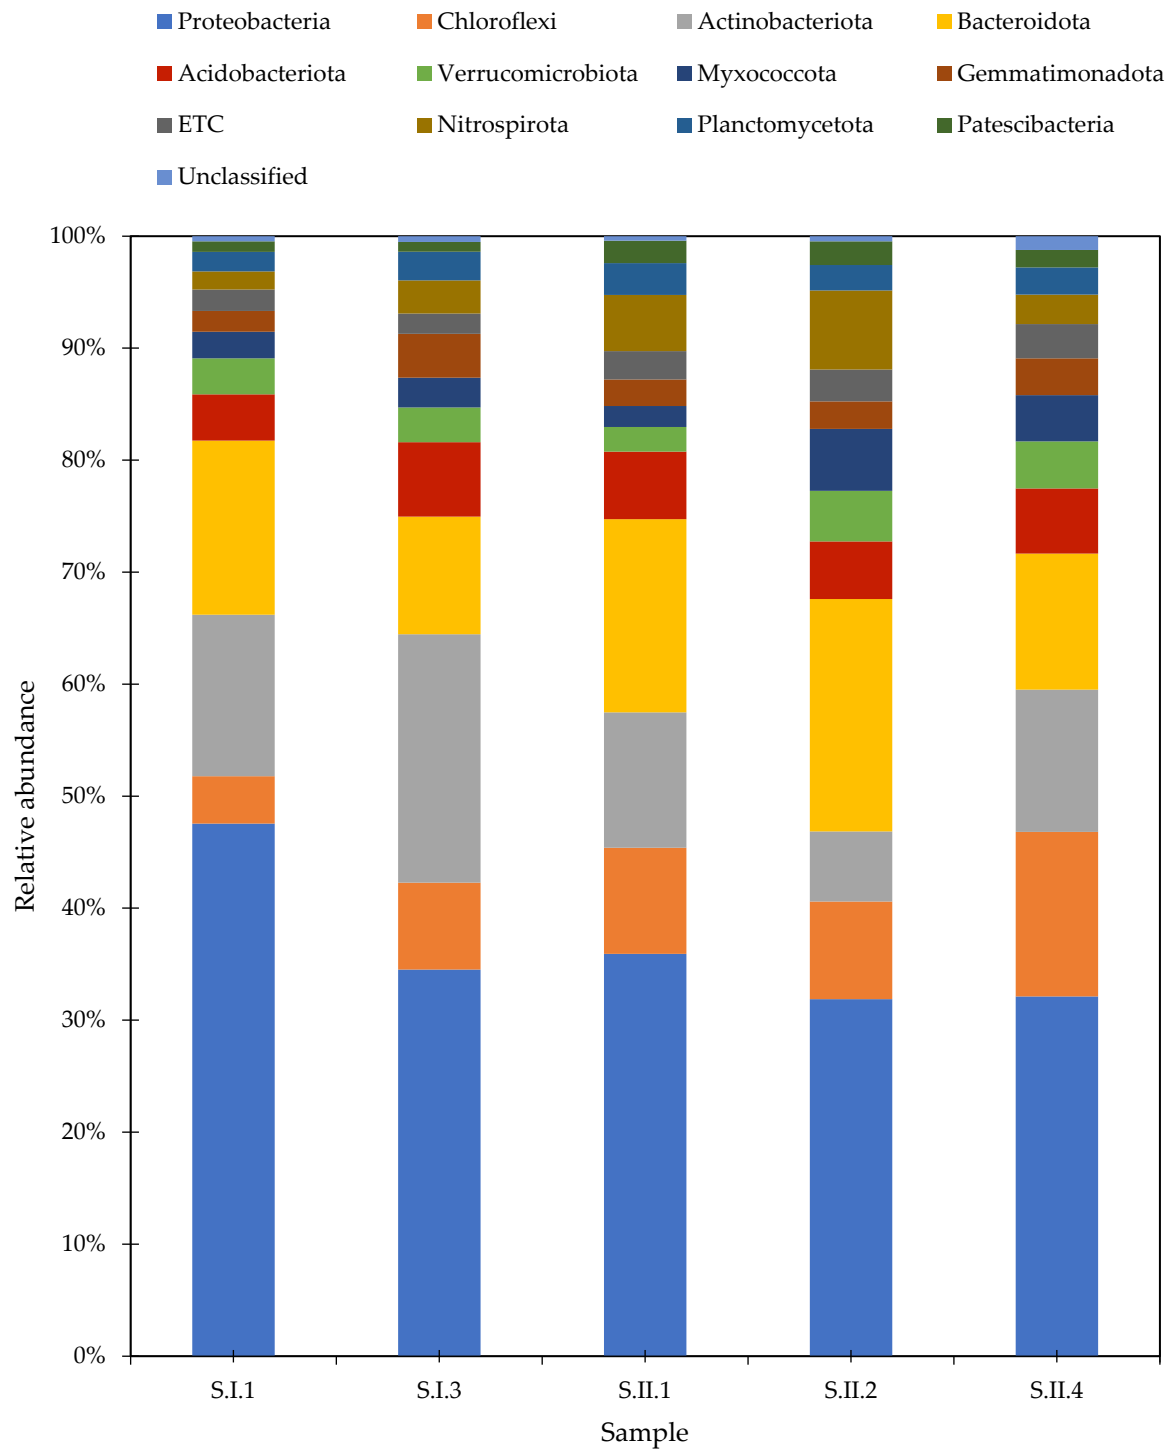

b.

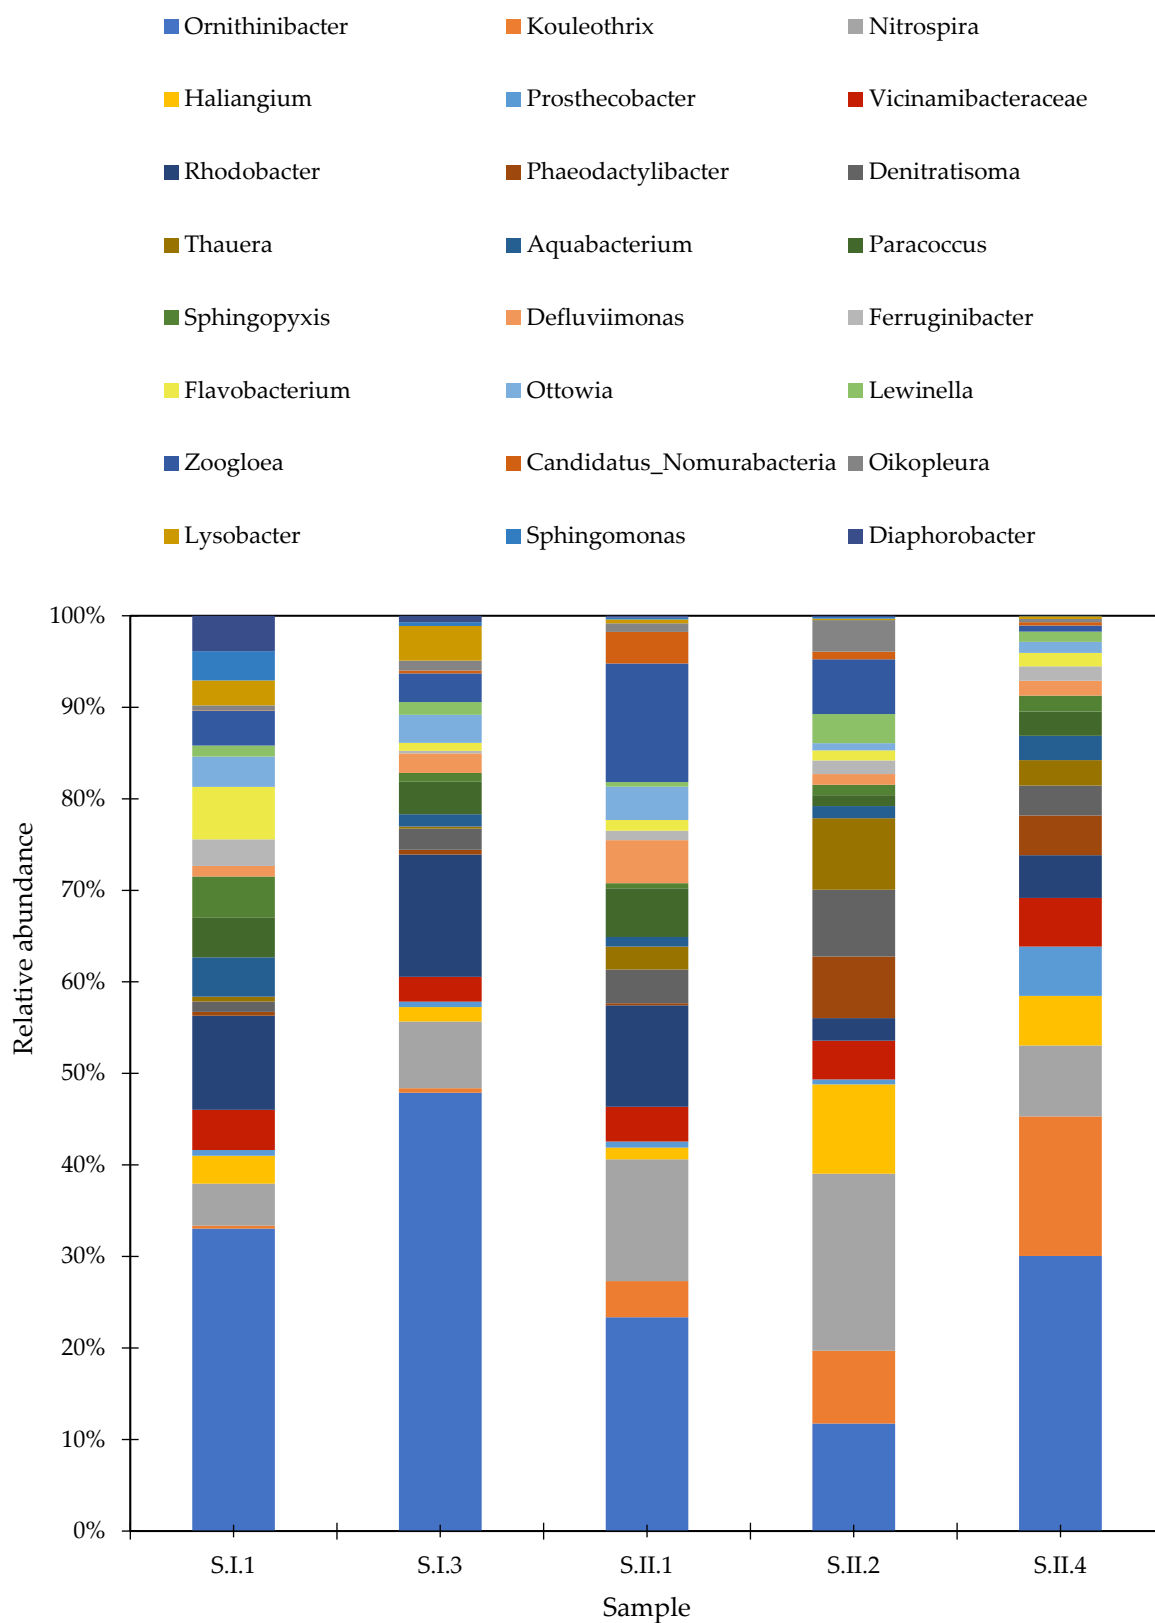

**Figure S2.** Relative abundance of the most prevalent (a) phyla and (b) genera in the studied samples. The graphs shows only taxa which contributed more than 1.0% to the total bacterial community. The abundance of the remaining taxa was summed and labelled as “ETC”

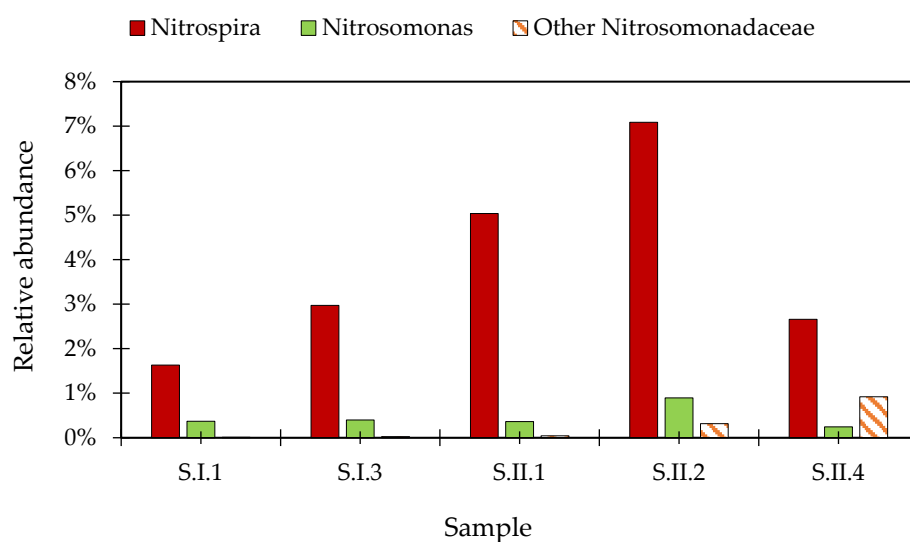

**Figure S3.** Relative abundance of the nitrifying guilds.

**Table S1** Compounds of the synthetic wastewater

| Synthetic wastewater             |               |
|----------------------------------|---------------|
| Compound                         | Concentration |
| Ammonium acetate                 | 225 mg/L      |
| Peptone                          | 135 mg/L      |
| Starch                           | 45 mg/L       |
| Glucose                          | 45 mg/L       |
| Glycerine                        | 0.049 ml/L    |
| NaHCO <sub>3</sub>               | 125 mg/L      |
| Na <sub>2</sub> HPO <sub>4</sub> | 15 mg/L       |
| KH <sub>2</sub> PO <sub>4</sub>  | 4.5 mg/L      |

**Table S2** Volatile suspended solids of biomass present in the MBSBBR.

| Stage | Series  | Suspended biomass | Biofilm*       | Suspended biomass/ Biofilm |
|-------|---------|-------------------|----------------|----------------------------|
|       |         | g MLVSS           | g MLVSS        | %                          |
| I     | S.I.1.  | 0.3652±0.0216     | 22.3498±0.0170 | 1.62±0.12                  |
|       | S.I.2.  | 0.3706±0.0329     | 22.4532±0.0020 | 1.60±0.01                  |
|       | S.I.3.  | 0.3851±0.0469     | 22.3688±0.0139 | 1.65±0.24                  |
| II    | S.II.1. | 0.3431±0.0334     | 22.9696±0.7417 | 1.30±0.02                  |
|       | S.II.2. | 0.3507±0.0309     | 34.0494±0.0217 | 1.10±0.01                  |
|       | S.II.3. | 0.3013±0.0712     | 16.0246±0.0346 | 1.39±0.56                  |
|       | S.II.4. | 0.3372±0.0140     | 21.6676±0.0030 | 1.45±0.01                  |

\* NOTE: Because the carriers did not return to the reactor to avoid disturbance of the system operation caused by excessive loss of biomass, 5 carriers were randomly collected from MBSBBR. This amount was less than 1% of all moving carriers in the reactor. Due to further experiments planned for MBSBBR, the amount of collected carriers was selected as follows so avoid affecting the system performance.

**Table S3** Estimates of microbial diversity and richness indices in the studied series.

| Stage | Sample name | OTUs | CHAO    | Shannon |
|-------|-------------|------|---------|---------|
| I     | S.I.1       | 1838 | 2109.56 | 5.10    |
|       | S.I.3       | 2085 | 2241.16 | 5.13    |
| II    | S.II.1      | 1832 | 2002.28 | 5.21    |
|       | S.II.2      | 1958 | 2138.43 | 5.51    |
|       | S.II.4      | 2056 | 2131.61 | 5.55    |

Supplementary material - - Results of particular Ammonia Utilisation Rate (AUR) and Nitrite Utilisation Rate (NitUR) tests

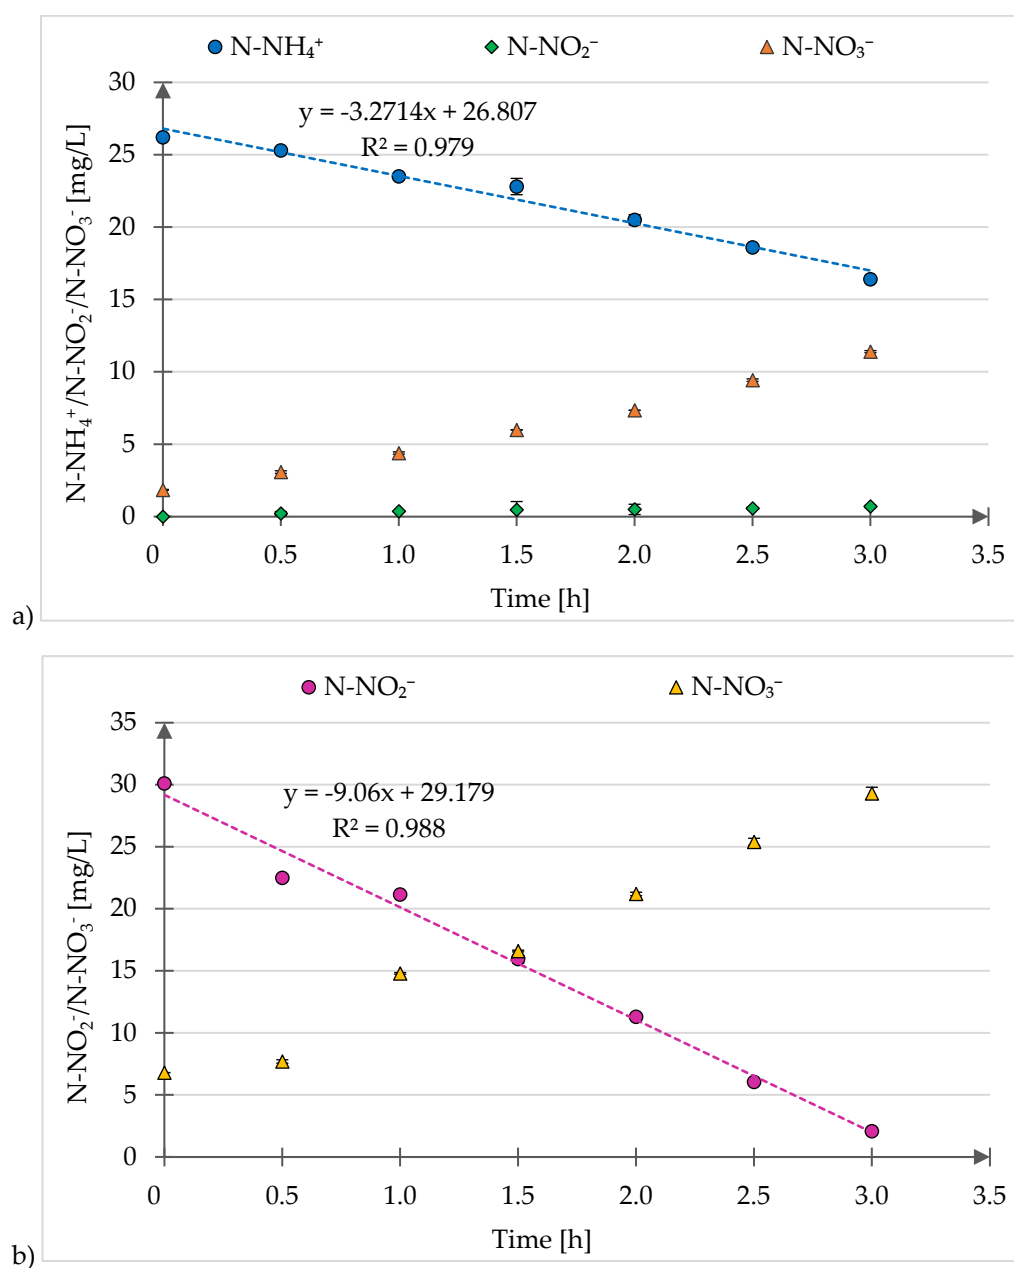

Figure S4.  $\text{N-NH}_4^+$ ,  $\text{N-NO}_2^-$ ,  $\text{N-NO}_3^-$  profiles during test (a) AUR (b) NitUR – S.I.1.

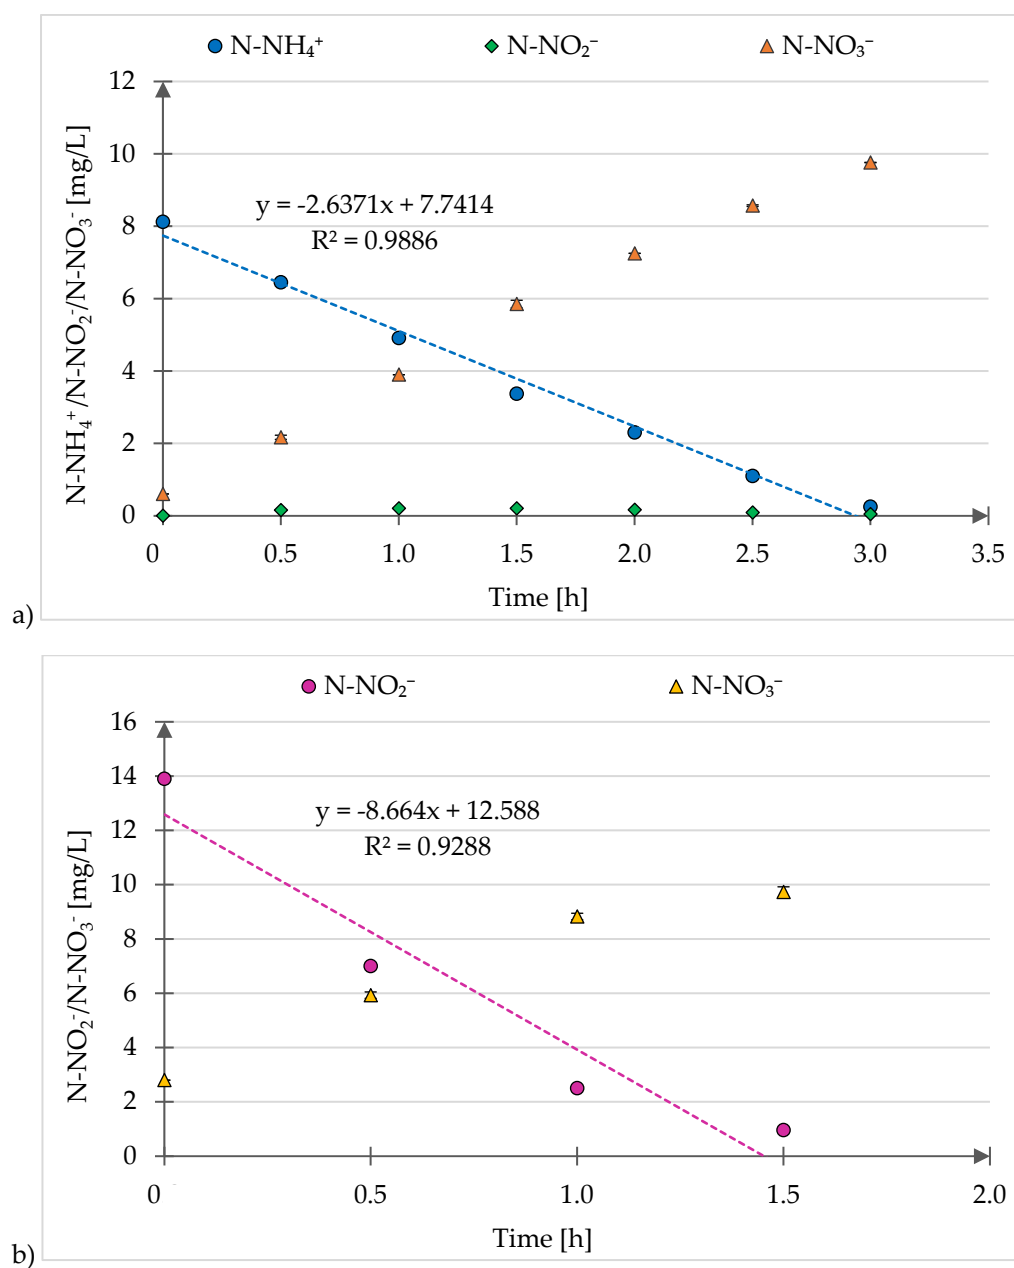

**Figure S5.**  $\text{N-NH}_4^+$ ,  $\text{N-NO}_2^-$ ,  $\text{N-NO}_3^-$  profiles during test (a) AUR (b) NitUR – S.I.2.

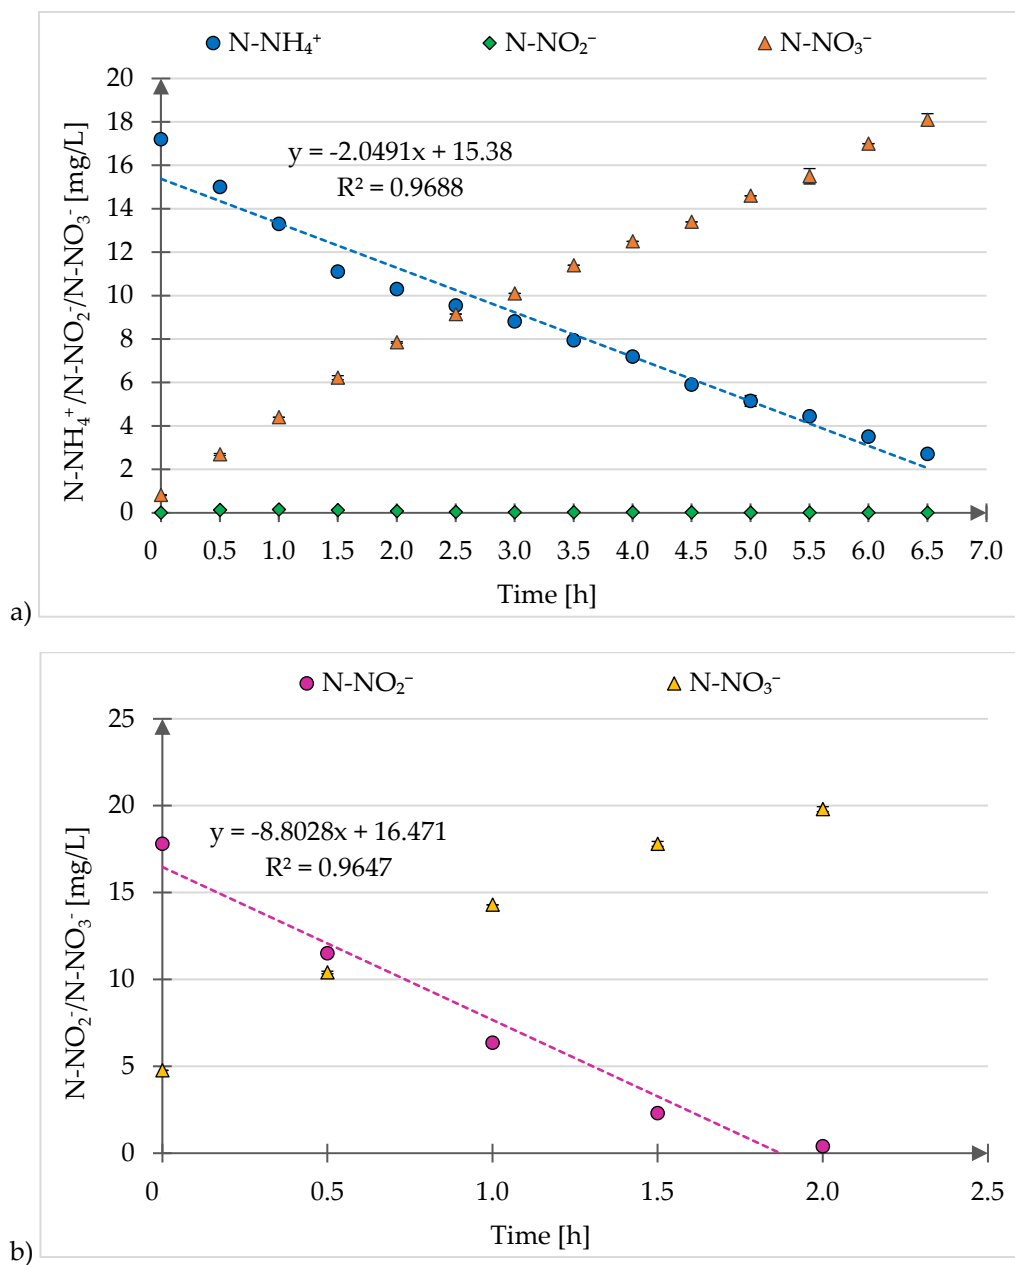

**Figure S6.**  $\text{N-NH}_4^+$ ,  $\text{N-NO}_2^-$ ,  $\text{N-NO}_3^-$  profiles during test (a) AUR (b) NitUR – S.I.3.



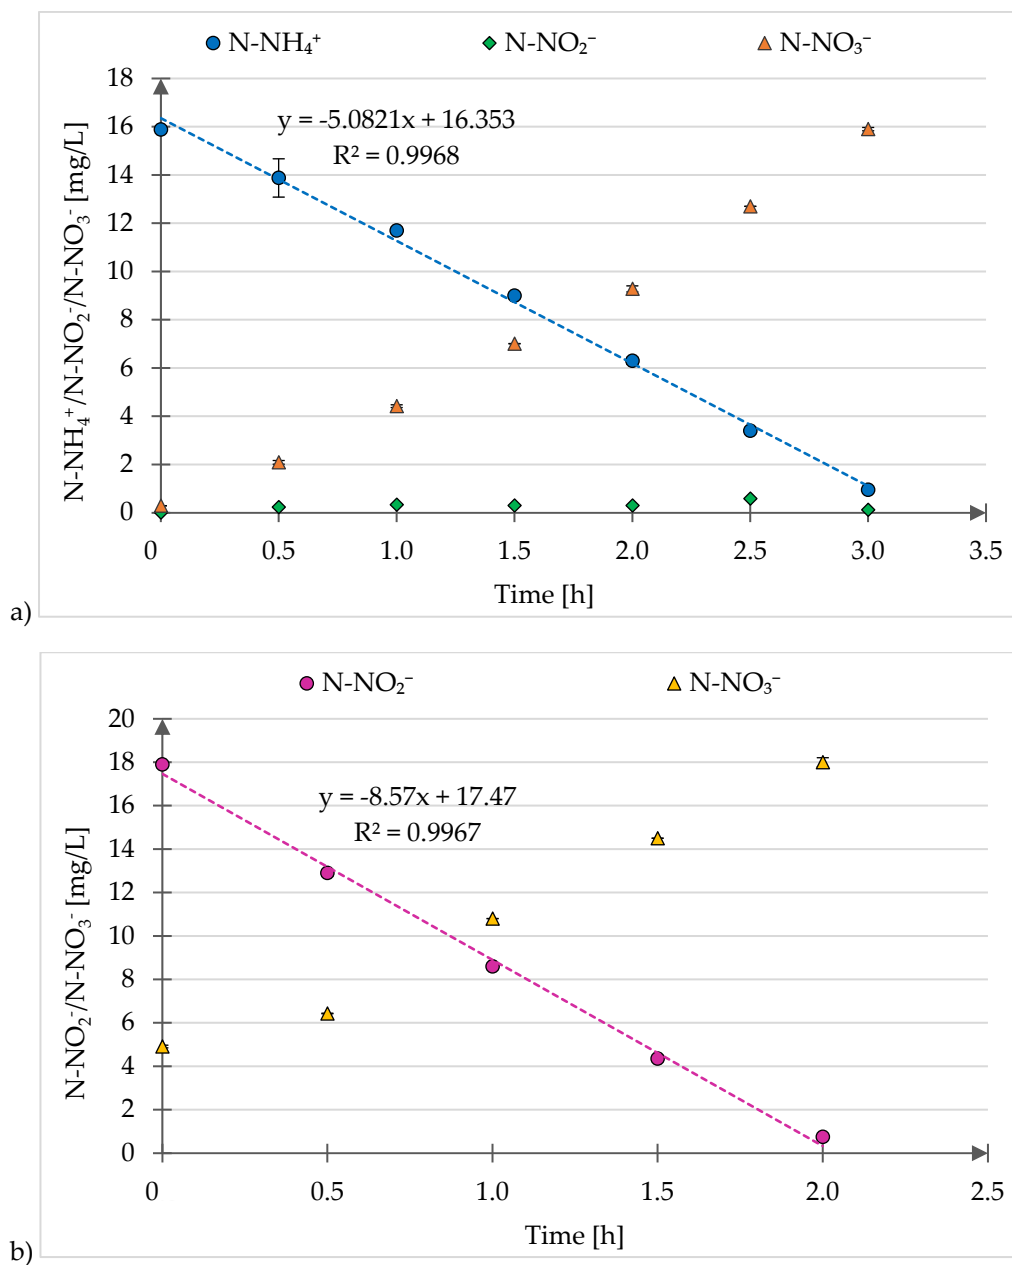

**Figure S7.**  $\text{N-NH}_4^+$ ,  $\text{N-NO}_2^-$ ,  $\text{N-NO}_3^-$  profiles during test (a) AUR (b) NitUR – S.II.1.

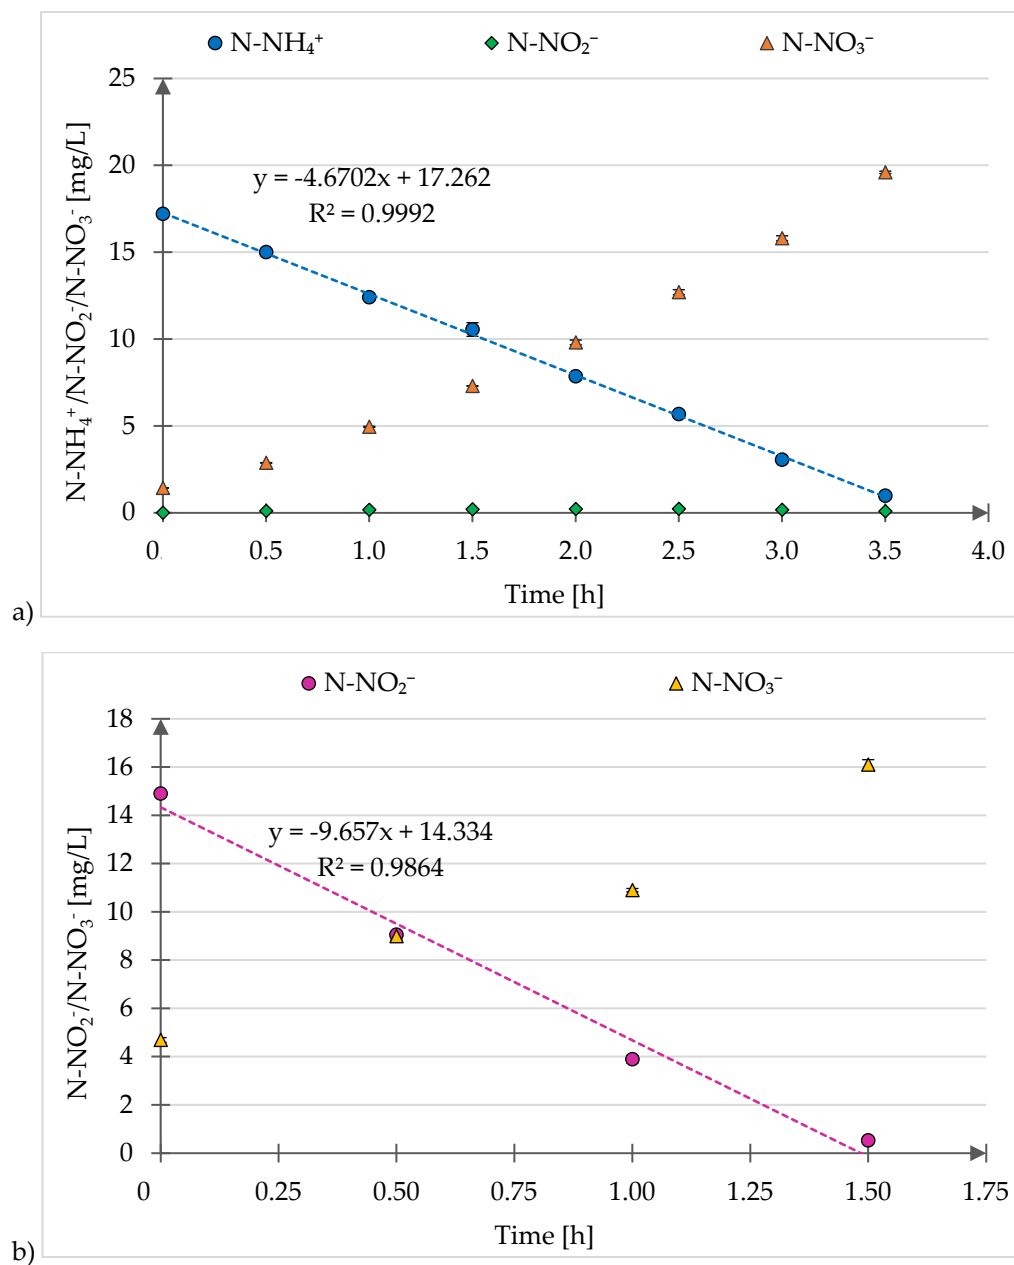

**Figure S8.**  $\text{N-NH}_4^+$ ,  $\text{N-NO}_2^-$ ,  $\text{N-NO}_3^-$  profiles during test (a) AUR (b) NitUR – S.II.2.

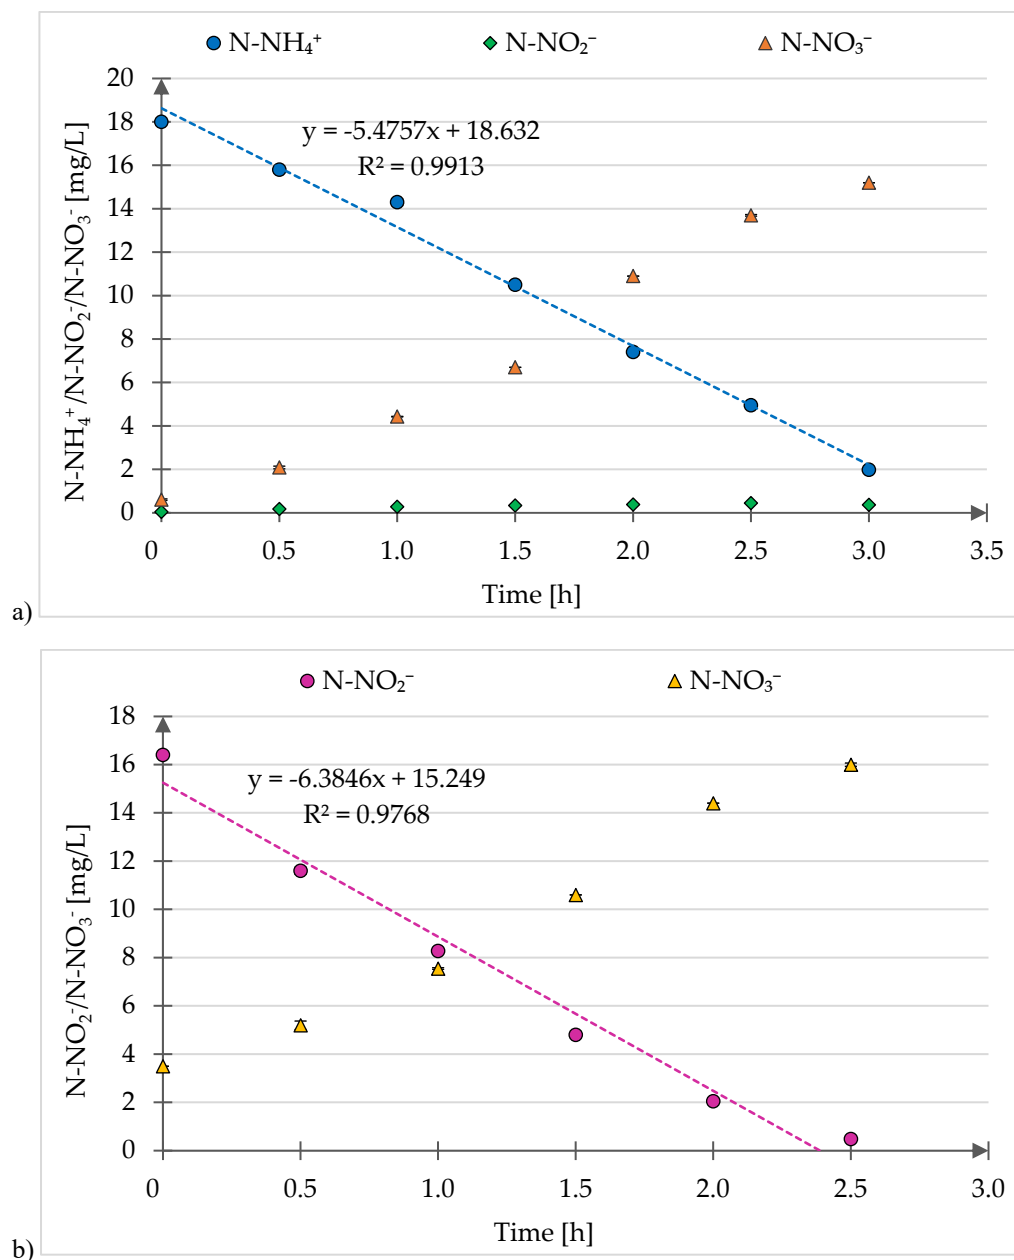

**Figure S9.**  $\text{N-NH}_4^+$ ,  $\text{N-NO}_2^-$ ,  $\text{N-NO}_3^-$  profiles during test (a) AUR (b) NitUR – S.II.3.

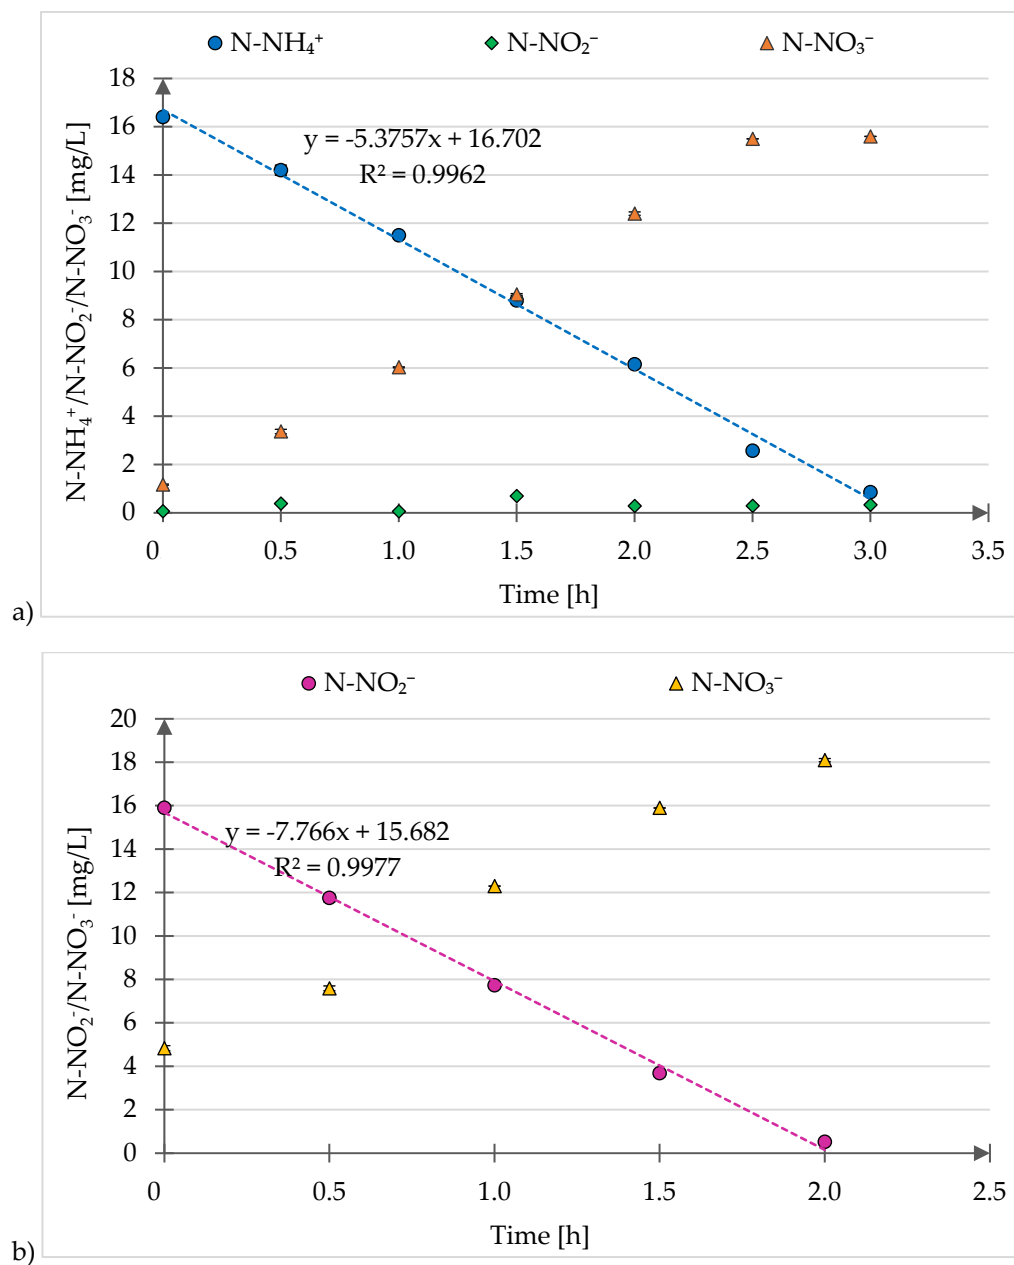

**Figure S10.**  $\text{N-NH}_4^+$ ,  $\text{N-NO}_2^-$ ,  $\text{N-NO}_3^-$  profiles during test (a) AUR (b) NitUR – S.II.4.
